# Supplementary material for: The relationship between affective symptoms and hypertension—role of the labelling effect: the 1946 British birth cohort
Source: HighWire-hosted journal article supplement (doi:10.1136/openhrt-2015-000341), 2016-01-01
Supplement: openhrt-2015-000341supp.pdf [file openhrt-2015-000341supp.pdf]

**Suppl. TABLE 1. Logistic regression between clinically ascertained hypertension at age 60-64 years and affective symptoms at 4 follow-up time-points (n=1683)**

| <i>Predictor</i>              | Clinically ascertained hypertension vs. normotension (982 vs. 701) |                               |                               |
|-------------------------------|--------------------------------------------------------------------|-------------------------------|-------------------------------|
|                               | Model 1                                                            | Model 2                       | Model 3                       |
|                               | OR (95 % CI), <i>p</i>                                             | OR (95 % CI), <i>p</i>        | OR (95 % CI), <i>p</i>        |
| <i>Caseness at age 60-64*</i> | <b>1.09 (0.85-1.41), 0.51</b>                                      | <b>1.06 (0.80-1.40), 0.70</b> | <b>1.05 (0.79-1.39), 0.73</b> |
| <i>Caseness at age 53*</i>    | <b>1.04 (0.81-1.33), 0.78</b>                                      | <b>0.99 (0.75-1.30), 0.94</b> | <b>0.99 (0.75-1.30), 0.94</b> |
| <i>Caseness at age 43*</i>    | <b>0.73 (0.95-1.30), 0.90</b>                                      | <b>0.84 (0.59-1.18), 0.32</b> | <b>0.82 (0.57-1.16), 0.26</b> |
| <i>Caseness at age 36*</i>    | <b>0.82 (0.52-1.28), 0.38</b>                                      | <b>0.81 (0.50-1.31), 0.40</b> | <b>0.79 (0.48-1.28), 0.33</b> |

\*Affective caseness assessed at each time point as follow: PSE-ID  $\geq 5$  at age 36, total PSF score  $\geq 23$  at age 43, and total GHQ-28 score  $\geq 5$  at ages 53 and 60-64.

Model 1: unadjusted logistic regression

Model 2: logistic regression adjusted for gender and BMI at age 60-64, educational attainment by age 26, socio-economic position at age 53, history of CVD and diabetes mellitus status at age 60-64

Model 3: Model 2 additionally adjusted for covariates at age 60-64: heart rate, current smoking, alcohol consumption and physical activity

**Suppl. TABLE 2. Logistic regression between self-reported hypertension at age 60-64 years and affective symptoms at 4 follow-up time-points (n=1683)**

| <i>Predictor</i>              | Self-reported hypertension vs. normotension (702 vs. 981) |                               |                               |
|-------------------------------|-----------------------------------------------------------|-------------------------------|-------------------------------|
|                               | Model 1                                                   | Model 2                       | Model 3                       |
|                               | OR (95 % CI), <i>p</i>                                    | OR (95 % CI), <i>p</i>        | OR (95 % CI), <i>p</i>        |
| <i>Caseness at age 60-64*</i> | <b>1.50 (1.17-1.93), 0.001</b>                            | <b>1.40 (1.07-1.84), 0.02</b> | <b>1.38 (1.04-1.81), 0.02</b> |
| <i>Caseness at age 53*</i>    | <b>1.26 (0.99-1.61), 0.06</b>                             | <b>1.15 (0.88-1.50), 0.31</b> | <b>1.13 (0.86-1.48), 0.37</b> |
| <i>Caseness at age 43*</i>    | <b>1.30 (0.95-1.78), 0.11</b>                             | <b>1.14 (0.81-1.60), 0.46</b> | <b>1.11 (0.78-1.57), 0.55</b> |
| <i>Caseness at age 36*</i>    | <b>1.22 (0.78-1.90), 0.38</b>                             | <b>1.16 (0.72-1.88), 0.54</b> | <b>1.14 (0.71-1.85), 0.59</b> |

\*Affective caseness assessed at each time point as follow: PSE-ID  $\geq 5$  at age 36, total PSF score  $\geq 23$  at age 43, and total GHQ-28 score  $\geq 5$  at ages 53 and 60-64.

Model 1: unadjusted logistic regression

Model 2: logistic regression adjusted for gender and BMI at age 60-64, educational attainment by age 26, socio-economic position at age 53, history of CVD and diabetes mellitus status at age 60-64

Model 3: Model 2 additionally adjusted for covariates at age 60-64: heart rate, current smoking, alcohol consumption and physical activity

**Suppl. TABLE 3. Characteristics of hypertensive participants at age 60-64 (n=982) and 53 (n=769) years by awareness hypertension status**

| Characteristics                                            | Unaware hypertensives*<br>at age 60-64<br>(n=333) | Aware hypertensives**<br>at age 60-64<br>(n=649) | <i>p-value</i> | Unaware hypertensives*<br>at age 53<br>(n=469) | Aware hypertensives**<br>at age 53<br>(n=300) | <i>p-value</i> |
|------------------------------------------------------------|---------------------------------------------------|--------------------------------------------------|----------------|------------------------------------------------|-----------------------------------------------|----------------|
| Gender (women), n %                                        | 138 (41.4)                                        | 328 (50.5)                                       | 0.007          | 188 (40.1)                                     | 160 (53.3)                                    | 0.0003         |
| Clinical features                                          |                                                   |                                                  |                |                                                |                                               |                |
| Systolic blood pressure (mm Hg) §                          | 151.3±0.9                                         | 141.6±0.6                                        | <0.0001        | 149.8 0.8                                      | 149.3 1.0                                     | 0.66           |
| Diastolic blood pressure (mm Hg) §                         | 84.3±0.5                                          | 79.7±0.3                                         | <0.0001        | 92.4 0.5                                       | 91.8 0.6                                      | 0.45           |
| Heart rate (bpm)                                           | 69.7±0.6                                          | 68.9±0.4                                         | 0.32           | 68.7 0.5                                       | 67.1 0.6                                      | 0.04           |
| Body mass index (kg/m <sup>2</sup> ) &                     | 28.2±0.3                                          | 29.6±0.2                                         | <0.0001        | 27.6 0.2                                       | 29.3 0.2                                      | <0.0001        |
| Questionnaire data                                         |                                                   |                                                  |                |                                                |                                               |                |
| Educational achievement at age 26<br>(higher level), n (%) | 130 (39.0)                                        | 243 (37.4)                                       | 0.62           | 200 (42.6)                                     | 103 (34.3)                                    | 0.02           |
| SEP at age 53 (non-manual skill), n (%)                    | 232 (69.7)                                        | 415 (63.9)                                       | 0.07           | 322 (68.7)                                     | 182 (60.7)                                    | 0.02           |
| Smokers (current), n (%)                                   | 36 (10.8)                                         | 74 (11.4)                                        | 0.78           | 89 (19.0)                                      | 37 (12.3)                                     | 0.01           |
| Drinkers (≥5 g/day), n (%)                                 | 252 (75.7)                                        | 455 (70.1)                                       | 0.06           | 223 (47.6)                                     | 113 (37.7)                                    | 0.007          |
| Leisure-time physical activity (inactive), n<br>(%)        | 204 (61.3)                                        | 441 (67.9)                                       | 0.04           | 284 (60.6)                                     | 147 (49.0)                                    | 0.002          |
| Antihypertensive treatment, n (%)                          | 0 (0.0)                                           | 562 (86.6)                                       | -              | 0 (0.0)                                        | 216 (72.0)                                    | -              |
| Diabetes mellitus, n (%)                                   | 23 (6.9)                                          | 112 (17.3)                                       | <0.0001        | 7 (1.5)                                        | 15 (5.0)                                      | 0.004          |
| Cardiovascular disease, n (%)                              | 25 (7.5)                                          | 145 (22.3)                                       | <0.0001        | 9 (1.9)                                        | 40 (13.3)                                     | <0.0001        |
| Affective symptoms, n (%) ¥                                | 40 (12.0)                                         | 139 (21.4)                                       | 0.0003         | 67 (14.3)                                      | 70 (23.3)                                     | 0.001          |
| Antidepressant treatment, n (%)                            | 14 (4.2)                                          | 58 (8.9)                                         | 0.007          | 15 (3.2)                                       | 15 (5.0)                                      | 0.20           |
| Clinically ascertained HT at age 53, n (%)                 | 149 (44.7)                                        | 479 (73.8)                                       | <0.0001        | -                                              | -                                             | -              |

Values are arithmetic means ± SE or number of subjects (%).

\*Unaware hypertensives = subjects with clinically ascertained hypertension but not self-reported hypertension. \*\*Aware hypertensives = subjects with both clinically ascertained and self-reported hypertension.

§ Average of two blood pressure readings. &The body mass index is weight in kilograms divided by the square of the height in meters. ¥Total GHQ-28 score ≥ 5. HT= hypertension; SEP=socio-economic position.

**Suppl. TABLE 4. Logistic regression between awareness of hypertension at age 60-64 years based on higher BP cut-off values and lifetime affective caseness variables (n=669)**

| Aware vs. unaware hypertensives (598 vs. 71) |                                                        |                                                         |                                                        |                          |                                                          |                                                    |                                                  |                          |
|----------------------------------------------|--------------------------------------------------------|---------------------------------------------------------|--------------------------------------------------------|--------------------------|----------------------------------------------------------|----------------------------------------------------|--------------------------------------------------|--------------------------|
| Model                                        | Cumulative lifetime affective caseness [OR (95 % CI)]* |                                                         |                                                        |                          | Age-specific lifetime affective caseness [OR (95 % CI)]* |                                                    |                                                  |                          |
|                                              | No symptoms<br>(n=406)                                 | Case-level symptoms<br>at 1 to 2 time-points<br>(n=207) | Case-level symptoms<br>at 3 to 4 time-points<br>(n=56) | p-value <sup>&amp;</sup> | No symptoms<br>(n=406)                                   | Case-level symptoms<br>only in the past<br>(n=128) | Case-level symptoms<br>at recent time<br>(n=135) | p-value <sup>&amp;</sup> |
| <b>Unadjusted</b>                            | 1.00                                                   | 2.60 (1.36,4.97)                                        | 2.82 (0.85,9.35)                                       | 0.005                    | 1.00                                                     | 2.16 (1.01,4.41)                                   | 3.43 (1.45,8.17)                                 | 0.005                    |
| <b>Fully adjusted<sup>§</sup></b>            | 1.00                                                   | 2.15 (1.09,4.24)                                        | 1.86 (0.53,6.48)                                       | 0.07                     | 1.00                                                     | 1.71 (0.79,3.67)                                   | 2.68 (1.09,6.62)                                 | 0.06                     |

Aware hypertensives = subjects with both clinically ascertained and self-reported hypertension. Unaware hypertensives = subjects with clinically ascertained but not self-reported hypertension.

\*Affective caseness assessed at each time point as follow: PSE-ID  $\geq 5$  at age 36, total PSF score  $\geq 23$  at age 43, and total GHQ-28 score  $\geq 5$  at ages 53 and 60-64. <sup>&</sup> p-value for trend

<sup>§</sup> Fully-adjusted model: logistic regression adjusted for gender, BMI at age 60-64, educational attainment by age 26, SEP at age 53 and history of CVD and diabetes mellitus, heart rate, lifestyle behaviours and antidepressant treatment at age 60-64 years.

**Suppl. TABLE 5. Logistic regression between affective symptoms at age 60-64 years and awareness of hypertension at age 53 years (n=755).**

| Case of affective symptoms at age 60-64 years vs non case (127 vs. 628)* |                                                                                     |                                           |                                              |                                  |                                 |
|--------------------------------------------------------------------------|-------------------------------------------------------------------------------------|-------------------------------------------|----------------------------------------------|----------------------------------|---------------------------------|
| <i>Predictor</i>                                                         | Awareness of HT at age 53 years by antihypertensive treatment status [OR (95 % CI)] |                                           |                                              |                                  |                                 |
|                                                                          | <i>Unaware</i><br>(n=460)                                                           | <i>Aware treated controlled</i><br>(n=73) | <i>Aware treated uncontrolled</i><br>(n=139) | <i>Aware untreated</i><br>(n=83) | <i>p-value</i> <sup>&amp;</sup> |
| <b>Model 1</b>                                                           | 1.00                                                                                | 2.23 (1.21-4.12)                          | 2.38 (1.48-3.85)                             | 2.49 (1.41-4.41)                 | 0.0002                          |
| <b>Model 2</b>                                                           | 1.00                                                                                | 1.73 (0.90-3.23)                          | 1.93 (1.15-3.25)                             | 2.40 (1.34-4.29)                 | 0.007                           |
| <b>Model 3</b>                                                           | 1.00                                                                                | 1.47 (0.75-2.88)                          | 1.83 (1.07-3.13)                             | 2.40 (1.32-4.36)                 | 0.02                            |

HT=hypertension. \*Affective caseness assessed as total GHQ-28 score  $\geq 5$ . <sup>&</sup> p-value for trend.

Unaware hypertensives = subjects with clinically ascertained but not self-reported hypertension.

Aware treated controlled hypertensives = subjects with both clinically ascertained and self-reported hypertension and on antihypertensive treatment with BP value less than 140/90 mmHg.

Aware treated uncontrolled hypertensives = subjects with both clinically ascertained and self-reported hypertension and on antihypertensive treatment with BP value higher than 140/90 mmHg.

Aware untreated hypertensives = subjects without antihypertensive treatment with both clinically ascertained and self-reported hypertension.

Model 1: unadjusted logistic regression

Model 2: logistic regression adjusted for gender, BMI at age 53, educational attainment by age 26, socio-economic position at age 53 and the following covariates at age 53: history of CVD and diabetes mellitus status, heart rate and lifestyle behaviours

Model 3: Model 2 additionally adjusted for affective symptoms at age 53
